# Supplementary material for: Transcriptome analysis of two recombinant inbred lines of common bean contrasting for symbiotic nitrogen fixation
Source: PLoS One. 2017 Feb 13;12(2):e0172141. doi: 10.1371/journal.pone.0172141 (PMC5305244; doi:10.1371/journal.pone.0172141)
Supplement: S6 Table — (XLSX) [file pone.0172141.s006.xlsx]

## Sheet: S6 Table
S6 Table. List of single nucleotide polymorphism (SNPs) and their physical positions in genes that were differentially expressed in leaves between SA36 and SA118 under nitrogen fixing condition, but not under non-fixing condition
Gene	Chromosome	SNP Physical Position	SP36 Base	SP118 Base
Phvul.001G183900	Pv01	44866312	G	C
Phvul.001G183900	Pv01	44866395	G	A
Phvul.003G195300	Pv03	40783551	C	G
Phvul.003G231900	Pv03	45358751	A	G
Phvul.004G093100	Pv04	25172511	A	G
Phvul.004G122000	Pv04	39327264	T	C
Phvul.004G122000	Pv04	39327555	A	G
Phvul.004G122000	Pv04	39327618	G	C
Phvul.004G122000	Pv04	39327650	T	C
Phvul.004G122000	Pv04	39327673	T	C
Phvul.004G122000	Pv04	39327686	C	T
Phvul.004G122000	Pv04	39327703	A	G
Phvul.004G138200	Pv04	41675242	T	A
Phvul.004G138200	Pv04	41675378	G	A
Phvul.004G138200	Pv04	41675428	T	C
Phvul.004G138200	Pv04	41675657	C	G
Phvul.004G138200	Pv04	41675800	T	C
Phvul.004G138200	Pv04	41675829	G	A
Phvul.004G138200	Pv04	41675887	G	A
Phvul.004G138200	Pv04	41675971	T	C
Phvul.004G138200	Pv04	41676070	A	T
Phvul.004G138200	Pv04	41676073	C	G
Phvul.004G167600	Pv04	44941594	A	G
Phvul.004G167600	Pv04	44941649	T	C
Phvul.004G167600	Pv04	44941669	C	G
Phvul.004G167600	Pv04	44941711	T	C
Phvul.004G167600	Pv04	44941722	G	T
Phvul.004G167600	Pv04	44941774	C	G
Phvul.004G167600	Pv04	44941780	T	C
Phvul.004G167600	Pv04	44941821	C	G
Phvul.004G167600	Pv04	44941830	A	G
Phvul.004G167600	Pv04	44942071	A	T
Phvul.004G167600	Pv04	44942135	G	A
Phvul.004G167600	Pv04	44942146	A	C
Phvul.004G167600	Pv04	44942210	C	G
Phvul.004G167600	Pv04	44942226	T	C
Phvul.005G009500	Pv05	821354	A	G
Phvul.005G009500	Pv05	822616	C	T
Phvul.005G048900	Pv05	5644906	C	T
Phvul.006G074600	Pv06	19396506	A	G
Phvul.007G106300	Pv07	12395716	T	C
Phvul.007G269600	Pv07	50790613	C	G
Phvul.008G049600	Pv08	4348049	A	G
Phvul.008G049600	Pv08	4349188	C	T
Phvul.008G252300	Pv08	56662757	G	T
Phvul.008G252300	Pv08	56663691	C	G
Phvul.008G252300	Pv08	56663735	C	A
Phvul.008G252300	Pv08	56663736	A	C
Phvul.008G252300	Pv08	56663986	T	A
Phvul.008G252300	Pv08	56664220	A	T
Phvul.008G252300	Pv08	56664227	C	T
Phvul.008G252300	Pv08	56664259	A	G
Phvul.008G252300	Pv08	56664322	G	A
Phvul.008G252300	Pv08	56664410	T	A
Phvul.008G252300	Pv08	56664458	G	C
Phvul.008G252300	Pv08	56664528	A	G
Phvul.008G252300	Pv08	56664529	G	C
Phvul.008G256900	Pv08	57000123	C	T
Phvul.008G256900	Pv08	57000271	G	C
Phvul.008G256900	Pv08	57000273	T	G
Phvul.008G256900	Pv08	57000397	T	G
Phvul.008G256900	Pv08	57000533	T	A
Phvul.008G256900	Pv08	57000538	G	C
Phvul.008G257800	Pv08	57045346	T	C
Phvul.008G257800	Pv08	57046797	T	C
Phvul.008G257800	Pv08	57046806	T	C
Phvul.008G257800	Pv08	57047186	C	T
Phvul.008G257800	Pv08	57047369	A	G
Phvul.008G273800	Pv08	58309978	T	G
Phvul.008G273800	Pv08	58310130	C	T
Phvul.008G273800	Pv08	58310302	A	G
Phvul.009G231200	Pv09	34115177	T	G
Phvul.009G231200	Pv09	34115191	C	A
Phvul.009G231200	Pv09	34115399	C	T
Phvul.009G231200	Pv09	34116200	A	G
Phvul.009G231200	Pv09	34116236	C	T
Phvul.009G231200	Pv09	34116373	A	G
Phvul.009G231200	Pv09	34117480	G	A
Phvul.010G050300	Pv10	7986274	C	T
Phvul.010G077300	Pv10	24895674	C	T
Phvul.010G077300	Pv10	24895678	C	T
Phvul.010G077300	Pv10	24895711	C	T
Phvul.010G148700	Pv10	41936363	C	G
Phvul.011G167300	Pv11	43710767	T	C
Phvul.011G167300	Pv11	43710850	T	C
Phvul.011G167300	Pv11	43710863	C	T
Phvul.011G167300	Pv11	43710868	C	T
Phvul.011G167300	Pv11	43710929	C	T
Phvul.011G167300	Pv11	43711017	A	G
Phvul.011G167300	Pv11	43711052	G	T
Phvul.011G167300	Pv11	43711199	G	A
Phvul.011G167300	Pv11	43711478	C	T
Phvul.011G182300	Pv11	45895309	A	G
Phvul.011G182300	Pv11	45896320	A	G
Phvul.011G182300	Pv11	45896365	T	C
Phvul.011G182300	Pv11	45896367	G	A
Phvul.011G182300	Pv11	45897309	T	A
Phvul.011G182300	Pv11	45897328	T	C
Phvul.011G182300	Pv11	45897487	C	T
Phvul.011G182300	Pv11	45897515	T	C
Phvul.011G182300	Pv11	45897965	C	A
Phvul.011G182300	Pv11	45897991	C	T
Phvul.011G182300	Pv11	45898028	G	A
Phvul.011G182300	Pv11	45898062	G	A
Phvul.011G182300	Pv11	45898113	T	G
Phvul.011G182300	Pv11	45898131	T	A
Phvul.011G182300	Pv11	45898226	A	T
Phvul.011G182300	Pv11	45898254	G	T
Phvul.011G182700	Pv11	45949242	A	G
Phvul.011G182700	Pv11	45950513	T	C
Phvul.011G182700	Pv11	45950561	A	C
Phvul.011G182700	Pv11	45950567	C	T
Phvul.011G202000	Pv11	48018370	A	G
